# Supplementary material for: Can public health reconcile profits and pandemics? An analysis of attitudes to commercial sector engagement in health policy and research
Source: PubMed Central journal article supplement (PMC5590731; doi:10.1371/journal.pone.0182612), 2017-09-08
Supplement: pone.0182612.s001.pdf [file pone.0182612.s001.pdf]

**3. There is a fundamental and irreconcilable conflict between industry interests and public health objectives.**

|         | Strongly Agree        | Agree                 | Neither agree nor disagree | Disagree              | Strongly Disagree     | Don't know            |
|---------|-----------------------|-----------------------|----------------------------|-----------------------|-----------------------|-----------------------|
| ALCOHOL | <input type="radio"/> | <input type="radio"/> | <input type="radio"/>      | <input type="radio"/> | <input type="radio"/> | <input type="radio"/> |
| FOOD    | <input type="radio"/> | <input type="radio"/> | <input type="radio"/>      | <input type="radio"/> | <input type="radio"/> | <input type="radio"/> |
| TOBACCO | <input type="radio"/> | <input type="radio"/> | <input type="radio"/>      | <input type="radio"/> | <input type="radio"/> | <input type="radio"/> |

**4. This industry should not receive preferential treatment, such as tax breaks and other financial incentives, that may conflict with public health goals.**

|         | Strongly Agree        | Agree                 | Neither agree nor disagree | Disagree              | Strongly Disagree     | Don't know            |
|---------|-----------------------|-----------------------|----------------------------|-----------------------|-----------------------|-----------------------|
| ALCOHOL | <input type="radio"/> | <input type="radio"/> | <input type="radio"/>      | <input type="radio"/> | <input type="radio"/> | <input type="radio"/> |
| FOOD    | <input type="radio"/> | <input type="radio"/> | <input type="radio"/>      | <input type="radio"/> | <input type="radio"/> | <input type="radio"/> |
| TOBACCO | <input type="radio"/> | <input type="radio"/> | <input type="radio"/>      | <input type="radio"/> | <input type="radio"/> | <input type="radio"/> |

**5. Government officials should not promote the interests of this industry overseas (e.g. by lobbying foreign governments on their behalf).**

|         | Strongly Agree        | Agree                 | Neither agree nor disagree | Disagree              | Strongly Disagree     | Don't know            |
|---------|-----------------------|-----------------------|----------------------------|-----------------------|-----------------------|-----------------------|
| ALCOHOL | <input type="radio"/> | <input type="radio"/> | <input type="radio"/>      | <input type="radio"/> | <input type="radio"/> | <input type="radio"/> |
| FOOD    | <input type="radio"/> | <input type="radio"/> | <input type="radio"/>      | <input type="radio"/> | <input type="radio"/> | <input type="radio"/> |
| TOBACCO | <input type="radio"/> | <input type="radio"/> | <input type="radio"/>      | <input type="radio"/> | <input type="radio"/> | <input type="radio"/> |

**6. Public health researchers, advocates and practitioners should not accept funding from this industry.**

|         | Strongly Agree        | Agree                 | Neither agree nor disagree | Disagree              | Strongly Disagree     | Don't know            |
|---------|-----------------------|-----------------------|----------------------------|-----------------------|-----------------------|-----------------------|
| ALCOHOL | <input type="radio"/> | <input type="radio"/> | <input type="radio"/>      | <input type="radio"/> | <input type="radio"/> | <input type="radio"/> |
| FOOD    | <input type="radio"/> | <input type="radio"/> | <input type="radio"/>      | <input type="radio"/> | <input type="radio"/> | <input type="radio"/> |
| TOBACCO | <input type="radio"/> | <input type="radio"/> | <input type="radio"/>      | <input type="radio"/> | <input type="radio"/> | <input type="radio"/> |

**7. Tobacco is a special case, and the principle of precluding partnership and minimising engagement should not be extended to this industry.**

|         | Strongly Agree        | Agree                 | Neither agree nor disagree | Disagree              | Strongly Disagree     | Don't know            |
|---------|-----------------------|-----------------------|----------------------------|-----------------------|-----------------------|-----------------------|
| ALCOHOL | <input type="radio"/> | <input type="radio"/> | <input type="radio"/>      | <input type="radio"/> | <input type="radio"/> | <input type="radio"/> |
| FOOD    | <input type="radio"/> | <input type="radio"/> | <input type="radio"/>      | <input type="radio"/> | <input type="radio"/> | <input type="radio"/> |

**8. Any comments on this section? (entirely optional).**

**3. Industry tactics to influence policy**

**1. Do you know of any evidence that the ALCOHOL, FOOD and TOBACCO industries has employed any of these tactics to achieve favourable policy outcomes?**

*\*Where you are aware of such evidence, please tick the relevant box. Please leave all other boxes blank.*

|                                                                                         | ALCOHOL                  | FOOD                     | TOBACCO                  |
|-----------------------------------------------------------------------------------------|--------------------------|--------------------------|--------------------------|
| Employ consultants                                                                      | <input type="checkbox"/> | <input type="checkbox"/> | <input type="checkbox"/> |
| Create or fund alliances or front groups                                                | <input type="checkbox"/> | <input type="checkbox"/> | <input type="checkbox"/> |
| Direct political funding of parties and/or politicians                                  | <input type="checkbox"/> | <input type="checkbox"/> | <input type="checkbox"/> |
| Funding of health promotion activities and/or pre-emption of policies                   | <input type="checkbox"/> | <input type="checkbox"/> | <input type="checkbox"/> |
| Funding research to create/maintain doubt about health implications                     | <input type="checkbox"/> | <input type="checkbox"/> | <input type="checkbox"/> |
| Intimidation of individuals or organisations that favour regulation of industry/product | <input type="checkbox"/> | <input type="checkbox"/> | <input type="checkbox"/> |
| Lobbying                                                                                | <input type="checkbox"/> | <input type="checkbox"/> | <input type="checkbox"/> |
| Recruit key government officials or                                                     | <input type="checkbox"/> | <input type="checkbox"/> | <input type="checkbox"/> |





**8. Universities and other higher education institutions should refuse to accept funding from this industry.**

|         | Strongly Agree        | Agree                 | Neither agree nor disagree | Disagree              | Strongly Disagree     | Don't know            |
|---------|-----------------------|-----------------------|----------------------------|-----------------------|-----------------------|-----------------------|
| ALCOHOL | <input type="radio"/> | <input type="radio"/> | <input type="radio"/>      | <input type="radio"/> | <input type="radio"/> | <input type="radio"/> |
| FOOD    | <input type="radio"/> | <input type="radio"/> | <input type="radio"/>      | <input type="radio"/> | <input type="radio"/> | <input type="radio"/> |
| TOBACCO | <input type="radio"/> | <input type="radio"/> | <input type="radio"/>      | <input type="radio"/> | <input type="radio"/> | <input type="radio"/> |

**9. Health journals should refuse to publish research funded by this industry.**

|         | Strongly Agree        | Agree                 | Neither agree nor disagree | Disagree              | Strongly Disagree     | Don't know            |
|---------|-----------------------|-----------------------|----------------------------|-----------------------|-----------------------|-----------------------|
| ALCOHOL | <input type="radio"/> | <input type="radio"/> | <input type="radio"/>      | <input type="radio"/> | <input type="radio"/> | <input type="radio"/> |
| FOOD    | <input type="radio"/> | <input type="radio"/> | <input type="radio"/>      | <input type="radio"/> | <input type="radio"/> | <input type="radio"/> |
| TOBACCO | <input type="radio"/> | <input type="radio"/> | <input type="radio"/>      | <input type="radio"/> | <input type="radio"/> | <input type="radio"/> |

**10. Academic journals should publish research funded by this industry, subject to standard requirements regarding declaration of interests.**

|         | Strongly Agree        | Agree                 | Neither agree nor disagree | Disagree              | Strongly Disagree     | Don't know            |
|---------|-----------------------|-----------------------|----------------------------|-----------------------|-----------------------|-----------------------|
| ALCOHOL | <input type="radio"/> | <input type="radio"/> | <input type="radio"/>      | <input type="radio"/> | <input type="radio"/> | <input type="radio"/> |
| FOOD    | <input type="radio"/> | <input type="radio"/> | <input type="radio"/>      | <input type="radio"/> | <input type="radio"/> | <input type="radio"/> |
| TOBACCO | <input type="radio"/> | <input type="radio"/> | <input type="radio"/>      | <input type="radio"/> | <input type="radio"/> | <input type="radio"/> |

**11. Any comments on this section? (entirely optional).**

**5. Cross-industry comparisons and distinctions**

---

**1. Do you agree with the following claim: *'The influence of the ALCOHOL industry on policy and research is less significant for public health than that of tobacco'?***

- Yes (Go to question 2)
- No (Skip question 2, go to question 3)
- Do not know (Skip question 2, go to question 3)

**2. I believe the influence of the ALCOHOL industry on policy and research is less significant for public health than that of tobacco because (select all those that apply):**

- Alcohol products are less harmful than tobacco products at the individual level
- Alcohol products are less harmful than tobacco products at the population level
- Alcohol products are more socially acceptable in the contexts in which I work
- Alcohol products are less socially acceptable in the contexts in which I work
- I personally find alcohol products more acceptable/appealing
- There is less evidence that the alcohol industry has attempted to influence policy in ways which are damaging to health
- There is less evidence that the alcohol industry has attempted to influence research in ways which are damaging to health
- There is less evidence that the alcohol industry has sought to mislead the public / policymakers about the negative health and social consequences of its products.

**3. Do you agree with the following claim: *'The influence of the FOOD industry on policy and research is less significant for public health than that of tobacco'?***

- Yes (Go to question 4)
- No (Skip question 4, go to question 5)
- Do not know (Skip question 4, go to question 5)

**4. I believe the influence of the FOOD industry on policy and research is less significant for public health than that of tobacco because (select all those that apply):**

- Food products are less harmful than tobacco products at the individual level
- Food products are less harmful than tobacco products at the population level
- Food products are more socially acceptable in the contexts in which I work

- Food products are less socially acceptable in the contexts in which I work
- I personally find food products more acceptable/appealing
- There is less evidence that the food industry has attempted to influence policy in ways which are damaging to health
- There is less evidence that the food industry has attempted to influence research in ways which are damaging to health
- There is less evidence that the food industry has sought to mislead the public / policymakers about the negative health and social consequences of its products.

**5. Any comments on this section? (entirely optional).**

**6. Personal experiences and views**

**1. Institutional affiliation**

- University
- Knowledge-broker
- Charity
- Advocacy/campaigning
- Think tank
- Health service
- National government
- Local Government
- Other (Please Specify)

**2. Which of these would you describe as a focus of your public health work? (please tick all that apply):**

- Alcohol
- Food / obesity
- Global health



- Health inequalities
- Health systems
- Health policy
- Non-communicable diseases
- Tobacco control
- Other (Please Specify)

**3. In what country do you primarily work?**

**4. Are you engaged in research?**

- Yes (Go to question 6)
- No (Skip question 6, go to question 7)

**5. If you are engaged in research, what methodological approach do you primarily employ? (please tick one):**

- Qualitative methods
- Mixed methods
- Quantitative, non-experimental methods
- Quantitative, experimental methods
- Other (Please Specify)

**6. In political matters, people talk of "the left" and "the right." How would you place your views on this scale, generally speaking?**

- '1 Left'    '2    '3    '4    '5    '6    '7    '8    '9    '10 Right'    Prefer not to say

**7. Are you affiliated with any of the following organisations/coalitions (tick all that apply)?**

- Conflict of Interest Coalition
- Framework Convention Alliance
- Global Alcohol Policy Alliance (GAPA)

- NCD Alliance
- UK Centre for Tobacco and Alcohol Studies (UKCTAS)
- World Health Organization

**8. Have you ever worked in any of the following industries? (tick all that apply)**

- Alcohol
- E-cigarettes
- Food and beverage
- Pharmaceutical
- Tobacco

**9. Do you have any formal relationship with, or financial investments in, any of the following industries? (tick all that apply)**

- Alcohol
- E-cigarettes
- Food and beverage
- Pharmaceutical
- Tobacco

**10. In the past ten years, have you received funding from any of the following sources for any research or other work relating to public health that you have undertaken / been professionally involved with (tick all that apply)?**

- Alcohol industry
- E-cigarette industry
- Food and non-alcoholic beverage industry
- Publicly funded health services
- Local Government
- Health/medical charity/campaigning organisation
- Other charity/campaigning organisation
- Pharmaceutical industry
- Charitable foundation (such as Wellcome Trust, Bill & Melinda Gates Foundation)
- Retail industry
- Tobacco industry

- National government
- Government funded research councils
- European Union
- International organisations
- Prefer not to say
- Other (Please Specify)

**11. Any comments on this section? (entirely optional).**

**7. FINAL QUESTIONS**

1. Have you found it particularly difficult to answer our questions in relation to any of these industries? (please tick all that apply).

- NO
- YES, FOR ALCOHOL
- YES, FOR FOOD
- YES, FOR TOBACCO
- YES, FOR E-CIGARETTES

2. If 'YES', can you briefly explain why?

3. Do you have any final comments on this survey overall?  
(entirely optional).

**8. THANK YOU!**

We really appreciate you taking the time to complete this survey and would be happy to keep you updated regarding the results of this research and/or a follow up interview. If you would like us to do so, please tick an appropriate box and write your name and e-mail address below. Please note that this information will be disconnected from your other answers (i.e. providing these details does not compromise the anonymity of the information you have provided).
