# Supplementary material for: Can public health reconcile profits and pandemics? An analysis of attitudes to commercial sector engagement in health policy and research
Source: PubMed Central journal article supplement (PMC5590731; doi:10.1371/journal.pone.0182612), 2017-09-08
Supplement: pone.0182612.s002.pdf [file pone.0182612.s002.pdf]

## S2 File. Results Frequency Distributions

### 1. INTRODUCTION

### 2. PRINCIPLES

1. Enabling the active participation of all key stakeholders, including this industry, is vital to effective health governance.

|         | Strongly Agree | Agree | Neither agree nor disagree | Disagree | Strongly Disagree | Don't know | Number of Respondents |
|---------|----------------|-------|----------------------------|----------|-------------------|------------|-----------------------|
| ALCOHOL | 15.6%          | 15.9% | 6.9%                       | 18.3%    | 40.8%             | 2.4%       | 333                   |
| FOOD    | 23.3%          | 23.6% | 8.2%                       | 16.6%    | 25.7%             | 2.7%       | 331                   |
| TOBACCO | 14.8%          | 9.0%  | 4.5%                       | 14.5%    | 54.2%             | 3.0%       | 332                   |

2. Policies should be adopted to improve accountability and transparency in any interaction between public sector employees and this industry on health policy and research.

|         | Strongly Agree | Agree | Neither agree nor disagree | Disagree | Strongly Disagree | Don't know | Number of Respondents |
|---------|----------------|-------|----------------------------|----------|-------------------|------------|-----------------------|
| ALCOHOL | 82.6%          | 14.4% | 0.6%                       | 0.6%     | 0.6%              | 1.2%       | 334                   |
| FOOD    | 80.5%          | 16.8% | 0.3%                       | 0.0%     | 0.6%              | 1.8%       | 333                   |
| TOBACCO | 82.9%          | 13.1% | 0.6%                       | 0.6%     | 0.9%              | 1.8%       | 328                   |

3. There is a fundamental and irreconcilable conflict between industry interests and public health objectives.

|         | Strongly Agree | Agree | Neither agree nor disagree | Disagree | Strongly Disagree | Don't know | Number of Respondents |
|---------|----------------|-------|----------------------------|----------|-------------------|------------|-----------------------|
| ALCOHOL | 57.8%          | 26.8% | 6.3%                       | 5.7%     | 2.7%              | 0.6%       | 332                   |
| FOOD    | 36.9%          | 29.9% | 15.1%                      | 11.8%    | 5.4%              | 0.9%       | 331                   |
| TOBACCO | 79.8%          | 13.3% | 2.7%                       | 1.5%     | 1.8%              | 0.9%       | 332                   |

4. This industry should not receive preferential treatment, such as tax breaks and other financial incentives, that may conflict with public health goals.

|         | Strongly Agree | Agree | Neither agree nor disagree | Disagree | Strongly Disagree | Don't know | Number of Respondents |
|---------|----------------|-------|----------------------------|----------|-------------------|------------|-----------------------|
| ALCOHOL | 84.6%          | 9.0%  | 3.6%                       | 1.8%     | 0.3%              | 0.6%       | 332                   |
| FOOD    | 69.6%          | 13.1% | 8.2%                       | 5.2%     | 2.4%              | 1.5%       | 329                   |
| TOBACCO | 88.1%          | 7.6%  | 2.1%                       | 0.9%     | 0.3%              | 0.9%       | 327                   |

5. Government officials should not promote the interests of this industry overseas (e.g. by lobbying foreign governments on their behalf).

|         | Strongly Agree | Agree | Neither agree nor disagree | Disagree | Strongly Disagree | Don't know | Number of Respondents |
|---------|----------------|-------|----------------------------|----------|-------------------|------------|-----------------------|
| ALCOHOL | 68.3%          | 13.3% | 8.2%                       | 7.6%     | 1.2%              | 1.5%       | 331                   |
| FOOD    | 48.9%          | 14.5% | 14.5%                      | 13.6%    | 5.4%              | 3.0%       | 331                   |
| TOBACCO | 82.5%          | 9.5%  | 4.6%                       | 1.8%     | 0.3%              | 1.2%       | 325                   |

6. Public health researchers, advocates and practitioners should not accept funding from this industry.

|         | Strongly Agree | Agree | Neither agree nor disagree | Disagree | Strongly Disagree | Don't know | Number of Respondents |
|---------|----------------|-------|----------------------------|----------|-------------------|------------|-----------------------|
| ALCOHOL | 69.0%          | 17.0% | 5.8%                       | 4.6%     | 3.0%              | 0.6%       | 329                   |

|                                                                                                                                                                |                |       |                            |          |                   |            |                       |
|----------------------------------------------------------------------------------------------------------------------------------------------------------------|----------------|-------|----------------------------|----------|-------------------|------------|-----------------------|
| FOOD                                                                                                                                                           | 51.5%          | 20.9% | 12.3%                      | 8.6%     | 5.5%              | 1.2%       | 326                   |
| TOBACCO                                                                                                                                                        | 78.3%          | 11.3% | 3.7%                       | 2.8%     | 3.1%              | 0.9%       | 327                   |
| 7. Tobacco is a special case, and the principle of precluding partnership and minimising engagement should not be extended to this industry.                   |                |       |                            |          |                   |            |                       |
|                                                                                                                                                                | Strongly Agree | Agree | Neither agree nor disagree | Disagree | Strongly Disagree | Don't know | Number of Respondents |
| ALCOHOL                                                                                                                                                        | 18.8%          | 13.5% | 8.5%                       | 14.1%    | 35.1%             | 10.0%      | 319                   |
| FOOD                                                                                                                                                           | 15.1%          | 15.1% | 15.8%                      | 18.3%    | 25.2%             | 10.4%      | 317                   |
| 3. INDUSTRY TACTICS TO INFLUENCE POLICY                                                                                                                        |                |       |                            |          |                   |            |                       |
| 1. Do you know of any evidence that the ALCOHOL, FOOD and TOBACCO industries has employed any of these tactics to achieve favourable policy outcomes?          |                |       |                            |          |                   |            |                       |
| <i>*Where you are aware of such evidence, please tick the relevant box. Please leave all other boxes blank.</i>                                                |                |       |                            |          |                   |            |                       |
|                                                                                                                                                                |                |       |                            | ALCOHOL  | FOOD              | TOBACCO    |                       |
| Employ consultants                                                                                                                                             |                |       |                            | 64.0%    | 58.1%             | 67.4%      |                       |
| Create or fund alliances or front groups                                                                                                                       |                |       |                            | 62.5%    | 51.3%             | 69.7%      |                       |
| Direct political funding of parties and/or politicians                                                                                                         |                |       |                            | 49.1%    | 43.4%             | 55.8%      |                       |
| Funding of health promotion activities and/or pre-emption of policies                                                                                          |                |       |                            | 62.5%    | 67.0%             | 50.9%      |                       |
| Funding research to create/maintain doubt about health implications                                                                                            |                |       |                            | 51.3%    | 54.7%             | 69.3%      |                       |
| Intimidation of individuals or organisations that favour regulation of industry/product                                                                        |                |       |                            | 30.0%    | 21.7%             | 53.6%      |                       |
| Lobbying                                                                                                                                                       |                |       |                            | 74.2%    | 71.5%             | 75.7%      |                       |
| Recruit key government officials or politicians (revolving door)                                                                                               |                |       |                            | 44.9%    | 39.0%             | 50.2%      |                       |
| Philanthropy                                                                                                                                                   |                |       |                            | 57.3%    | 57.3%             | 53.6%      |                       |
| Corporate social responsibility                                                                                                                                |                |       |                            | 61.4%    | 59.9%             | 56.2%      |                       |
| Public relations / efforts to shape public perceptions of industry and/or its products                                                                         |                |       |                            | 73.0%    | 73.0%             | 70.4%      |                       |
| Litigation                                                                                                                                                     |                |       |                            | 35.6%    | 27.3%             | 64.4%      |                       |
| Use of trade agreements                                                                                                                                        |                |       |                            | 34.1%    | 32.2%             | 55.1%      |                       |
| Number of Respondents                                                                                                                                          |                |       |                            |          |                   |            | 267                   |
| 4. RECOMMENDATIONS                                                                                                                                             |                |       |                            |          |                   |            |                       |
| 1. Voluntary agreements with this industry will enable public health to progress more rapidly than statutory approaches.                                       |                |       |                            |          |                   |            |                       |
|                                                                                                                                                                | Strongly Agree | Agree | Neither agree nor disagree | Disagree | Strongly Disagree | Don't know | Number of Respondents |
| ALCOHOL                                                                                                                                                        | 1.9%           | 4.9%  | 8.6%                       | 21.6%    | 59.3%             | 3.7%       | 268                   |
| FOOD                                                                                                                                                           | 4.1%           | 9.4%  | 11.3%                      | 19.9%    | 48.9%             | 6.4%       | 266                   |
| TOBACCO                                                                                                                                                        | 2.6%           | 1.9%  | 5.2%                       | 13.4%    | 73.2%             | 3.7%       | 269                   |
| 2. Multi-stakeholder partnerships involving this industry should be promoted to enable access to its knowledge, expertise, technology and financial resources. |                |       |                            |          |                   |            |                       |

|         | Strongly Agree | Agree | Neither agree nor disagree | Disagree | Strongly Disagree | Don't know | Number of Respondents |
|---------|----------------|-------|----------------------------|----------|-------------------|------------|-----------------------|
| ALCOHOL | 4.5%           | 12.9% | 9.8%                       | 20.1%    | 45.8%             | 6.8%       | 264                   |
| FOOD    | 9.4%           | 18.8% | 13.9%                      | 17.7%    | 31.6%             | 8.6%       | 266                   |
| TOBACCO | 3.8%           | 9.1%  | 4.9%                       | 12.9%    | 62.4%             | 6.8%       | 263                   |

3. This industry should be excluded from the formulation of public health policies, but can have a significant role in policy implementation.

|         | Strongly Agree | Agree | Neither agree nor disagree | Disagree | Strongly Disagree | Don't know | Number of Respondents |
|---------|----------------|-------|----------------------------|----------|-------------------|------------|-----------------------|
| ALCOHOL | 30.6%          | 26.8% | 10.9%                      | 13.6%    | 14.3%             | 3.8%       | 265                   |
| FOOD    | 24.7%          | 34.6% | 10.6%                      | 12.2%    | 11.8%             | 6.1%       | 263                   |
| TOBACCO | 33.6%          | 19.5% | 7.6%                       | 11.1%    | 24.0%             | 4.2%       | 262                   |

4. Public and third sector organisations should reject partnerships and non-binding agreements with this industry.

|         | Strongly Agree | Agree | Neither agree nor disagree | Disagree | Strongly Disagree | Don't know | Number of Respondents |
|---------|----------------|-------|----------------------------|----------|-------------------|------------|-----------------------|
| ALCOHOL | 60.1%          | 20.9% | 7.5%                       | 6.0%     | 2.2%              | 3.4%       | 268                   |
| FOOD    | 41.5%          | 20.8% | 16.2%                      | 10.9%    | 4.9%              | 5.7%       | 265                   |
| TOBACCO | 72.5%          | 13.8% | 5.2%                       | 4.5%     | 1.5%              | 2.6%       | 269                   |

5. The public health community should not engage with this industry's social responsibility initiatives.

|         | Strongly Agree | Agree | Neither agree nor disagree | Disagree | Strongly Disagree | Don't know | Number of Respondents |
|---------|----------------|-------|----------------------------|----------|-------------------|------------|-----------------------|
| ALCOHOL | 57.6%          | 22.5% | 6.3%                       | 8.9%     | 3.7%              | 1.1%       | 271                   |
| FOOD    | 40.4%          | 20.7% | 16.7%                      | 13.0%    | 5.6%              | 3.7%       | 270                   |
| TOBACCO | 69.1%          | 17.6% | 3.3%                       | 4.4%     | 4.0%              | 1.5%       | 272                   |

6. Health charities, public sector organisations and health campaigning organisations should fully divest their funds from this industry.

|         | Strongly Agree | Agree | Neither agree nor disagree | Disagree | Strongly Disagree | Don't know | Number of Respondents |
|---------|----------------|-------|----------------------------|----------|-------------------|------------|-----------------------|
| ALCOHOL | 62.9%          | 17.2% | 9.0%                       | 4.5%     | 3.0%              | 3.4%       | 267                   |
| FOOD    | 36.3%          | 17.2% | 23.6%                      | 11.2%    | 5.2%              | 6.4%       | 267                   |
| TOBACCO | 76.8%          | 12.5% | 4.8%                       | 1.1%     | 2.6%              | 2.2%       | 271                   |

7. Universities and other higher education institutions should fully divest their funds from this industry.

|         | Strongly Agree | Agree | Neither agree nor disagree | Disagree | Strongly Disagree | Don't know | Number of Respondents |
|---------|----------------|-------|----------------------------|----------|-------------------|------------|-----------------------|
| ALCOHOL | 63.4%          | 15.5% | 10.2%                      | 4.2%     | 3.8%              | 3.0%       | 265                   |
| FOOD    | 36.7%          | 15.4% | 23.9%                      | 11.2%    | 7.3%              | 5.4%       | 259                   |
| TOBACCO | 77.1%          | 11.3% | 5.6%                       | 1.5%     | 2.3%              | 2.3%       | 266                   |

8. Universities and other higher education institutions should refuse to accept funding from this industry.

|         | Strongly Agree | Agree | Neither agree nor disagree | Disagree | Strongly Disagree | Don't know | Number of Respondents |
|---------|----------------|-------|----------------------------|----------|-------------------|------------|-----------------------|
| ALCOHOL | 66.3%          | 14.7% | 9.2%                       | 6.2%     | 2.2%              | 1.5%       | 273                   |

|                                                                                                                                                                             |                |       |                            |                  |                   |                  |                       |                  |
|-----------------------------------------------------------------------------------------------------------------------------------------------------------------------------|----------------|-------|----------------------------|------------------|-------------------|------------------|-----------------------|------------------|
| FOOD                                                                                                                                                                        | 39.6%          | 14.8% | 22.6%                      | 12.6%            | 5.9%              | 4.4%             | 270                   |                  |
| TOBACCO                                                                                                                                                                     | 79.5%          | 9.2%  | 5.1%                       | 3.3%             | 1.8%              | 1.1%             | 273                   |                  |
| 9. Health journals should refuse to publish research funded by this industry.                                                                                               |                |       |                            |                  |                   |                  |                       |                  |
|                                                                                                                                                                             | Strongly Agree | Agree | Neither agree nor disagree | Disagree         | Strongly Disagree | Don't know       | Number of Respondents |                  |
| ALCOHOL                                                                                                                                                                     | 44.6%          | 19.9% | 12.7%                      | 12.0%            | 6.9%              | 4.0%             | 276                   |                  |
| FOOD                                                                                                                                                                        | 31.1%          | 16.1% | 23.1%                      | 15.0%            | 8.4%              | 6.2%             | 273                   |                  |
| TOBACCO                                                                                                                                                                     | 56.4%          | 14.5% | 8.7%                       | 10.2%            | 6.5%              | 3.6%             | 275                   |                  |
| 10. Academic journals should publish research funded by this industry, subject to standard requirements regarding declaration of interests.                                 |                |       |                            |                  |                   |                  |                       |                  |
|                                                                                                                                                                             | Strongly Agree | Agree | Neither agree nor disagree | Disagree         | Strongly Disagree | Don't know       | Number of Respondents |                  |
| ALCOHOL                                                                                                                                                                     | 17.5%          | 27.7% | 9.1%                       | 19.7%            | 21.9%             | 4.0%             | 274                   |                  |
| FOOD                                                                                                                                                                        | 17.9%          | 31.9% | 15.8%                      | 15.8%            | 13.9%             | 4.8%             | 273                   |                  |
| TOBACCO                                                                                                                                                                     | 17.2%          | 23.4% | 7.0%                       | 15.8%            | 33.3%             | 3.3%             | 273                   |                  |
| 5. CROSS-INDUSTRY COMPARISONS AND DISTINCTIONS                                                                                                                              |                |       |                            |                  |                   |                  |                       |                  |
| 1. Do you agree with the following claim: <i>'The influence of the ALCOHOL industry on policy and research is less significant for public health than that of tobacco'?</i> |                |       |                            | N of Respondents | % of Respondents  |                  |                       |                  |
| Yes (Go to question 2)                                                                                                                                                      |                |       |                            | 76               | 27.1%             |                  |                       |                  |
| No (Skip question 2, go to question 3)                                                                                                                                      |                |       |                            | 162              | 57.9%             |                  |                       |                  |
| Do not know (Skip question 2, go to question 3)                                                                                                                             |                |       |                            | 42               | 15.0%             |                  |                       |                  |
| Number of Respondents                                                                                                                                                       |                |       |                            | 280              | 100.0%            |                  |                       |                  |
| 2. I believe the influence of the ALCOHOL industry on policy and research is less significant for public health than that of tobacco because (select all those that apply): |                |       |                            |                  |                   |                  | N of Responses        | % of Respondents |
| Alcohol products are less harmful than tobacco products at the individual level                                                                                             |                |       |                            |                  |                   |                  | 45                    | 52.9%            |
| Alcohol products are less harmful than tobacco products at the population level                                                                                             |                |       |                            |                  |                   |                  | 37                    | 43.5%            |
| Alcohol products are more socially acceptable in the contexts in which I work                                                                                               |                |       |                            |                  |                   |                  | 34                    | 40.0%            |
| Alcohol products are less socially acceptable in the contexts in which I work                                                                                               |                |       |                            |                  |                   |                  | 5                     | 5.9%             |
| I personally find alcohol products more acceptable/appealing                                                                                                                |                |       |                            |                  |                   |                  | 25                    | 29.4%            |
| There is less evidence that the alcohol industry has attempted to influence policy in ways which are damaging to health                                                     |                |       |                            |                  |                   |                  | 30                    | 35.3%            |
| There is less evidence that the alcohol industry has attempted to influence research in ways which are damaging to health                                                   |                |       |                            |                  |                   |                  | 26                    | 30.6%            |
| There is less evidence that the alcohol industry has sought to mislead the public / policymakers about the negative health and social consequences of its products.         |                |       |                            |                  |                   |                  | 42                    | 49.4%            |
| Number of respondents                                                                                                                                                       |                |       |                            |                  |                   |                  |                       | 85               |
| 3. Do you agree with the following claim: <i>'The influence of the FOOD industry on policy and research is less significant for public health than that of tobacco'?</i>    |                |       |                            |                  | N of Respondents  | % of Respondents |                       |                  |
| Yes (Go to question 4)                                                                                                                                                      |                |       |                            |                  | 91                | 33.0%            |                       |                  |

|                                                                                                                                                                          |                |                  |
|--------------------------------------------------------------------------------------------------------------------------------------------------------------------------|----------------|------------------|
| No (Skip question 4, go to question 5)                                                                                                                                   | 140            | 50.7%            |
| Do not know (Skip question 4, go to question 5)                                                                                                                          | 45             | 16.3%            |
| Number of Respondents                                                                                                                                                    | 276            | 100.0%           |
|                                                                                                                                                                          |                |                  |
| 4. I believe the influence of the FOOD industry on policy and research is less significant for public health than that of tobacco because (select all those that apply): | N of Responses | % of Respondents |
| Food products are less harmful than tobacco products at the individual level                                                                                             | 64             | 68.8%            |
| Food products are less harmful than tobacco products at the population level                                                                                             | 54             | 58.1%            |
| Food products are more socially acceptable in the contexts in which I work                                                                                               | 53             | 57.0%            |
| Food products are less socially acceptable in the contexts in which I work                                                                                               | 4              | 4.3%             |
| I personally find food products more acceptable/appealing                                                                                                                | 36             | 38.7%            |
| There is less evidence that the food industry has attempted to influence policy in ways which are damaging to health                                                     | 34             | 36.6%            |
| There is less evidence that the food industry has attempted to influence research in ways which are damaging to health                                                   | 28             | 30.1%            |
| There is less evidence that the food industry has sought to mislead the public / policymakers about the negative health and social consequences of its products.         | 28             | 30.1%            |
| Number of respondents                                                                                                                                                    |                | 93               |

| 6. PERSONAL EXPERIENCES AND VIEWS                                                                         |                |                  |
|-----------------------------------------------------------------------------------------------------------|----------------|------------------|
| 1. Institutional affiliation                                                                              | N of Responses | % of Respondents |
| University                                                                                                | 103            | 38.7%            |
| Knowledge-broker                                                                                          | 18             | 6.8%             |
| Charity                                                                                                   | 43             | 16.2%            |
| Advocacy/campaigning                                                                                      | 74             | 27.8%            |
| Think tank                                                                                                | 9              | 3.4%             |
| Health service                                                                                            | 48             | 18.0%            |
| National government                                                                                       | 21             | 7.9%             |
| Local Government                                                                                          | 12             | 4.5%             |
| Other (Specify)                                                                                           | 37             | 13.9%            |
| Number of respondents                                                                                     |                | 266              |
|                                                                                                           |                |                  |
| 2. Which of these would you describe as a focus of your public health work? (please tick all that apply): | N of Responses | % of Respondents |
| Alcohol                                                                                                   | 89             | 33.0%            |
| Food / obesity                                                                                            | 105            | 38.9%            |
| Global health                                                                                             | 72             | 26.7%            |
| Health inequalities                                                                                       | 83             | 30.7%            |
| Health systems                                                                                            | 46             | 17.0%            |
| Health policy                                                                                             | 108            | 40.0%            |

|                           |     |       |
|---------------------------|-----|-------|
| Non-communicable diseases | 91  | 33.7% |
| Tobacco control           | 109 | 40.4% |
| Other (Specify)           | 34  | 12.6% |
| Number of respondents     |     | 270   |

| 3. In what country do you primarily work? |                  |                  |
|-------------------------------------------|------------------|------------------|
| Country                                   | N of Respondents | % of Respondents |
| UK                                        | 78               | 24.2             |
| Canada                                    | 62               | 19.3             |
| Australia                                 | 19               | 5.9              |
| USA                                       | 11               | 3.4              |
| India                                     | 9                | 2.8              |
| Global                                    | 7                | 2.2              |
| Brazil                                    | 6                | 1.9              |
| New Zealand                               | 5                | 1.6              |
| Europe/EU                                 | 5                | 1.6              |
| Other                                     | 60               | 18.6             |
| N of respondents                          |                  | 262              |

| 4. Are you engaged in research?        | N of Respondents | % of Respondents |
|----------------------------------------|------------------|------------------|
| Yes (Go to question 6)                 | 151              | 55.9%            |
| No (Skip question 6, go to question 7) | 119              | 44.1%            |
| Number of respondents                  | 270              | 100.0%           |

| 5. If you are engaged in research, what methodological approach do you primarily employ? | N of Responses | % of Respondents |
|------------------------------------------------------------------------------------------|----------------|------------------|
| Qualitative methods                                                                      | 49             | 32.0%            |
| Mixed methods                                                                            | 81             | 52.9%            |
| Quantitative, non-experimental methods                                                   | 55             | 35.9%            |
| Quantitative, experimental methods                                                       | 13             | 8.5%             |
| Other (Specify)                                                                          | 3              | 2.0%             |
| Number of respondents                                                                    |                | 153              |

| 6. In political matters, people talk of "the left" and "the right." How would you place your views on this scale, generally speaking? | N of Respondents | % of Respondents |
|---------------------------------------------------------------------------------------------------------------------------------------|------------------|------------------|
|---------------------------------------------------------------------------------------------------------------------------------------|------------------|------------------|

|                       |     |        |
|-----------------------|-----|--------|
| '1 Left'              | 19  | 7.1%   |
| '2'                   | 55  | 20.6%  |
| '3'                   | 68  | 25.5%  |
| '4'                   | 28  | 10.5%  |
| '5'                   | 25  | 9.4%   |
| '6'                   | 10  | 3.7%   |
| '7'                   | 10  | 3.7%   |
| '8'                   | 5   | 1.9%   |
| '9'                   | 0   | 0.0%   |
| '10 Right'            | 0   | 0.0%   |
| Prefer not to say     | 47  | 17.6%  |
| Number of respondents | 267 | 100.0% |

| 7. Are you affiliated with any of the following organisations/coalitions (tick all that apply)? | N of Responses | % of Respondents |
|-------------------------------------------------------------------------------------------------|----------------|------------------|
| Conflict of Interest Coalition                                                                  | 34             | 26.8%            |
| Framework Convention Alliance                                                                   | 45             | 35.4%            |
| Global Alcohol Policy Alliance (GAPA)                                                           | 23             | 18.1%            |
| NCD Alliance                                                                                    | 44             | 34.6%            |
| UK Centre for Tobacco and Alcohol Studies (UKCTAS)                                              | 16             | 12.6%            |
| World Health Organization                                                                       | 54             | 42.5%            |
| Number of respondents                                                                           |                | 127              |

| 8. Have you ever worked in any of the following industries? (tick all that apply) | N of Responses | % of Respondents |
|-----------------------------------------------------------------------------------|----------------|------------------|
| Alcohol                                                                           | 5              | 16.7%            |
| E-cigarettes                                                                      | 0              | 0.0%             |
| Food and beverage                                                                 | 19             | 63.3%            |
| Pharmaceutical                                                                    | 13             | 43.3%            |
| Tobacco                                                                           | 2              | 6.7%             |
| Number of respondents                                                             |                | 30               |

| 9. Do you have any formal relationship with, or financial investments in, any of the following industries? (tick all that apply) | N of Responses | % of Respondents |
|----------------------------------------------------------------------------------------------------------------------------------|----------------|------------------|
| Alcohol                                                                                                                          | 2              | 14.3%            |
| E-cigarettes                                                                                                                     | 0              | 0.0%             |
| Food and beverage                                                                                                                | 8              | 57.1%            |
| Pharmaceutical                                                                                                                   | 5              | 35.7%            |
| Tobacco                                                                                                                          | 0              | 0.0%             |
| Number of respondents                                                                                                            |                | 14               |

| 10. In the past ten years, have you received funding from any of the following sources for any research or other work relating to public health that you have undertaken / been professionally involved with (tick all that apply)? | N of Responses | % of Respondents |
|-------------------------------------------------------------------------------------------------------------------------------------------------------------------------------------------------------------------------------------|----------------|------------------|
| Alcohol industry                                                                                                                                                                                                                    | 1              | 0.5%             |
| E-cigarette industry                                                                                                                                                                                                                | 0              | 0.0%             |
| Food and non-alcoholic beverage industry                                                                                                                                                                                            | 10             | 5.1%             |
| Publicly funded health services                                                                                                                                                                                                     | 68             | 34.3%            |
| Local Government                                                                                                                                                                                                                    | 50             | 25.3%            |
| Health/medical charity/campaigning organisation                                                                                                                                                                                     | 75             | 37.9%            |
| Other charity/campaigning organisation                                                                                                                                                                                              | 33             | 16.7%            |
| Pharmaceutical industry                                                                                                                                                                                                             | 28             | 14.1%            |
| Charitable foundation (such as Wellcome Trust, Bill & Melinda Gates Foundation)                                                                                                                                                     | 69             | 34.8%            |
| Retail industry                                                                                                                                                                                                                     | 5              | 2.5%             |
| Tobacco industry                                                                                                                                                                                                                    | 0              | 0.0%             |
| National government                                                                                                                                                                                                                 | 106            | 53.5%            |
| Government funded research councils                                                                                                                                                                                                 | 67             | 33.8%            |
| European Union                                                                                                                                                                                                                      | 45             | 22.7%            |
| International organisations                                                                                                                                                                                                         | 67             | 33.8%            |
| Prefer not to say                                                                                                                                                                                                                   | 2              | 1.0%             |
| Other (Specify)                                                                                                                                                                                                                     | 15             | 7.6%             |
| Number of respondents                                                                                                                                                                                                               |                | 198              |

| 7. FINAL QUESTIONS                                                                                                                        |                |                  |
|-------------------------------------------------------------------------------------------------------------------------------------------|----------------|------------------|
| 1. Have you found it particularly difficult to answer our questions in relation to any of these industries? (please tick all that apply). | N of Responses | % of Respondents |
| NO                                                                                                                                        | 119            | 46.1%            |
| YES, FOR ALCOHOL                                                                                                                          | 36             | 14.0%            |
| YES, FOR FOOD                                                                                                                             | 94             | 36.4%            |
| YES, FOR TOBACCO                                                                                                                          | 19             | 7.4%             |
| Number of respondents                                                                                                                     |                | 258              |
